# Supplementary material for: Genome-wide analysis of G-quadruplexes in herpesvirus genomes
Source: PubMed Central journal article supplement (PMC5117502; doi:10.1186/s12864-016-3282-1), 2016-11-21
Supplement: 12864_2016_3282_MOESM7_ESM.pdf [file 12864_2016_3282_MOESM7_ESM.pdf]

**Table S5.** Sequence of PQS oligos from the promoter region of UL24, UL2, and K15.

| <b>PQS name</b> | <b>Sequence</b>          |
|-----------------|--------------------------|
| UL24            | GGGTGAGGGCCGGGGGCGGGG    |
| UL2             | GGGGATTTTGGGTTGGGTCGGG   |
| K15             | GGGGTCCCCCGGGGCGGGGCGGGG |
